# Supplementary material for: Highly oxidized U(vi) within the smallest fullerene: gas-phase synthesis and computational study of boron-doped U@C27B
Source: Royal Society of Chemistry journal article supplement (doi:10.1039/d2qi02160a), 2022-12-07
Supplement: d2qi02160a1.pdf [file d2qi02160a1.pdf]

## Electronic Supplementary Information

# Highly oxidized U(VI) within the smallest fullerene: Gas-phase synthesis and computational study of boron-doped U@C<sub>27</sub>B

Antonio Moreno-Vicente,<sup>a</sup> Marc Alías,<sup>a</sup> Paul W. Dunk,<sup>b</sup> Coen de Graaf,<sup>\*a,c</sup> Josep M. Poblet<sup>a</sup> and Antonio Rodríguez-Forteza<sup>\*a</sup>

<sup>a</sup> *Departament Química Física i Inorgànica, Universitat Rovira i Virgili, C/Marcel·lí Domingo 1, 43007, Tarragona, Spain.*

<sup>b</sup> *National High Magnetic Field Laboratory, Florida State University, 1800 East Paul Dirac Drive, Tallahassee, FL 32310, USA.*

<sup>c</sup> *ICREA, Pg Lluís Companys 23, 08010, Barcelona, Spain.*

|                                                                                                        |    |
|--------------------------------------------------------------------------------------------------------|----|
| <b>Figure S1.</b> SA(10)-CASSCF natural orbitals of U@C <sub>27</sub> B .....                          | 2  |
| <b>Figure S2.</b> CASSCF localized orbitals of U@C <sub>27</sub> B .....                               | 2  |
| <b>Figure S3.</b> Effect of the imaginary level shift in the CASPT2 .....                              | 3  |
| <b>Figure S4.</b> Spin densities for U(VI) f <sup>0</sup> and U(V) f <sup>1</sup> configurations ..... | 3  |
| <b>Table S1.</b> Occupation numbers in the localized orbitals of U@C <sub>27</sub> B .....             | 4  |
| <b>Table S2.</b> Energy and character with the main CSFs of U@C <sub>27</sub> B <sup>+</sup> .....     | 5  |
| <b>Figure S5.</b> SA(10)-CASSCF natural orbitals of U@C <sub>27</sub> B <sup>+</sup> .....             | 5  |
| <b>Figure S6.</b> Histogram of the Pa-cage distances in Pa@C <sub>27</sub> B .....                     | 6  |
| <b>Figure S7.</b> Frontier molecular orbitals of Pa@C <sub>27</sub> B.....                             | 6  |
| <b>Table S3.</b> Bond critical points between U and the cage atoms of U@C <sub>27</sub> B.....         | 7  |
| <b>Figure S8.</b> Schematic representation of critical points .....                                    | 7  |
| <b>Table S4.</b> Bond critical points between Pa and the cage atoms of Pa@C <sub>27</sub> B.....       | 8  |
| <b>Table S5.</b> Relative energies of exohedral U-C <sub>27</sub> B isomers.....                       | 9  |
| <b>Figure S9.</b> Structure of Exo-2 U-C <sub>27</sub> B system .....                                  | 9  |
| <b>Table S6.</b> Delocalization indexes for U-cage interactions.....                                   | 10 |
| <b>Figure S10.</b> U-cage distances for different functionals .....                                    | 11 |
| xyz coordinates of optimized structures .....                                                          | 12 |

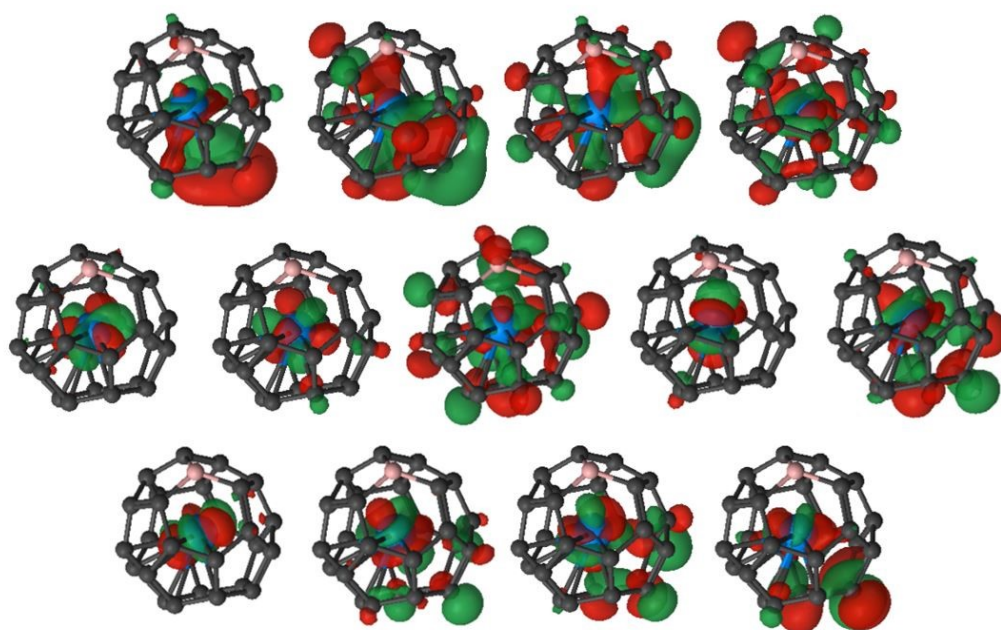

**Figure S1.** SA(10)-CASSCF natural orbitals for the 10 lowest doublets in  $U@C_{27}B$ .

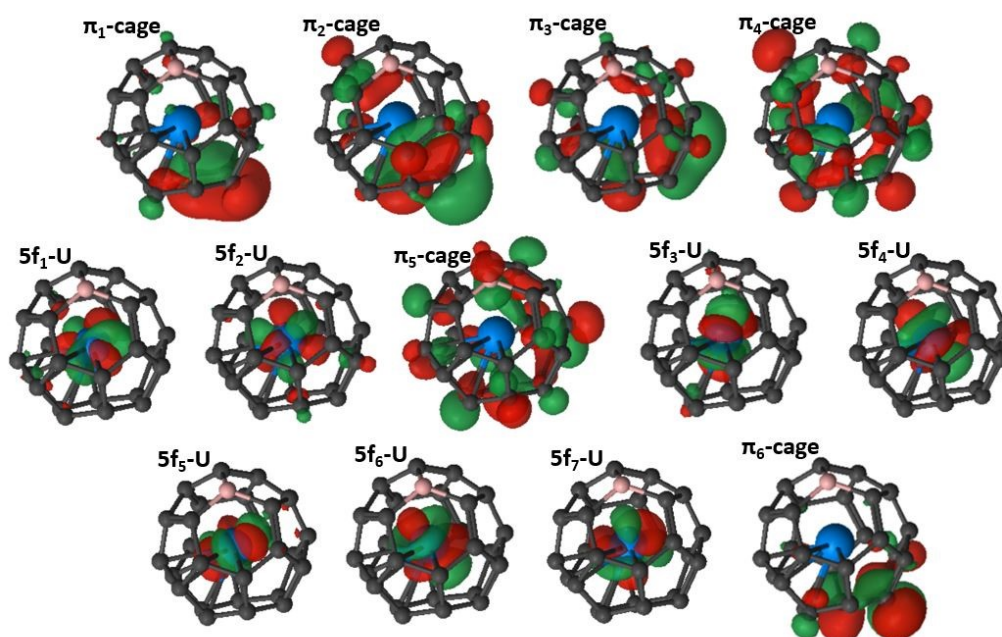

**Figure S2.** CASSCF localized orbitals for the 10 lowest doublets in  $U@C_{27}B$ .

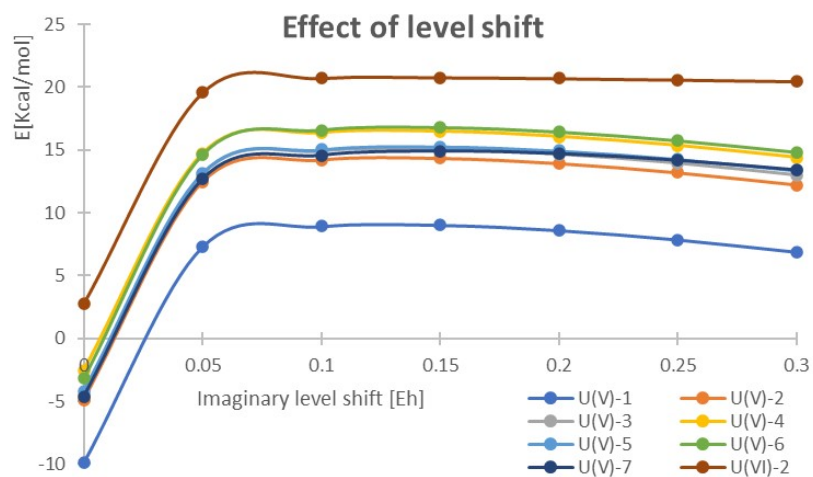

**Figure S3.** Effect of the imaginary level shift in the CASPT2 relative energies. The zero of energy at each imaginary level shift is established by the energy of the U(VI)-1 state.

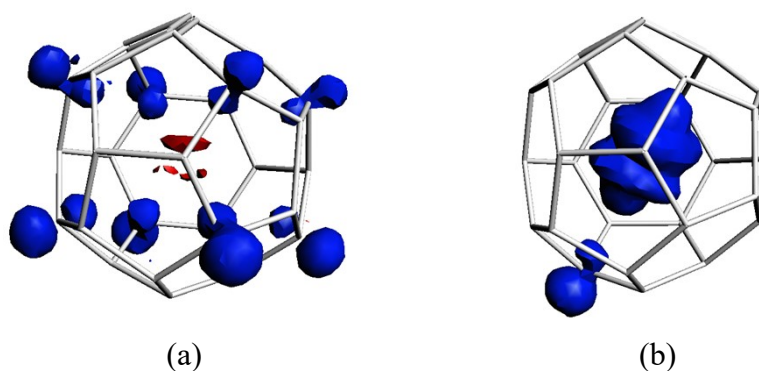

**Figure S4.** Spin density (0.007 a.u. isosurface) computed at PBE0/TZP level of the (a) electronic ground state, formally U(VI)  $f^0$  configuration; and (b) electronic state at 3.6 kcal mol<sup>-1</sup>, formally U(V)  $f^1$  configuration.

**Table S1.** Occupation number in the localized orbitals for the lowest doublet states of U@C<sub>27</sub>B, number of electrons over U atom, label of the state and energy in Kcal/mol. Energies of the states are computed at CASPT2 using an imaginary shift of 0.05 Eh and CASSCF energies in parenthesis.

|                       | $\pi_1$ -cage | $\pi_2$ -cage | $\pi_3$ -cage | $\pi_4$ -cage | 5f <sub>1</sub> -U | 5f <sub>2</sub> -U | $\pi_5$ -cage | 5f <sub>3</sub> -U | 5f <sub>4</sub> -U | 5f <sub>5</sub> -U | 5f <sub>6</sub> -U | 5f <sub>7</sub> -U | $\pi_6$ -cage | #el in U | Label   | E [kcal/mol] |
|-----------------------|---------------|---------------|---------------|---------------|--------------------|--------------------|---------------|--------------------|--------------------|--------------------|--------------------|--------------------|---------------|----------|---------|--------------|
| <b>1<sup>2</sup>A</b> | 1.93          | 1.95          | 1.94          | 0.05          | 0.00               | 0.00               | 0.04          | 1.00               | 0.01               | 0.00               | 0.01               | 0.01               | 0.07          | 1.03     | U(V)-1  | 7.3 (0.0)    |
| <b>2<sup>2</sup>A</b> | 1.93          | 1.94          | 1.94          | 0.05          | 0.00               | 1.00               | 0.04          | 0.00               | 0.01               | 0.00               | 0.01               | 0.01               | 0.07          | 1.03     | U(V)-2  | 12.5 (5.7)   |
| <b>3<sup>2</sup>A</b> | 1.93          | 1.94          | 1.94          | 0.05          | 0.99               | 0.00               | 0.04          | 0.00               | 0.01               | 0.00               | 0.01               | 0.01               | 0.07          | 1.03     | U(V)-3  | 13.1 (6.7)   |
| <b>4<sup>2</sup>A</b> | 1.94          | 1.94          | 1.93          | 0.05          | 0.00               | 0.00               | 0.04          | 0.00               | 0.01               | 0.99               | 0.01               | 0.01               | 0.07          | 1.03     | U(V)-4  | 14.7 (7.8)   |
| <b>5<sup>2</sup>A</b> | 1.93          | 1.94          | 1.94          | 0.05          | 0.00               | 0.00               | 0.05          | 0.00               | 0.01               | 0.00               | 0.01               | 0.99               | 0.07          | 1.02     | U(V)-5  | 13.2 (8.1)   |
| <b>6<sup>2</sup>A</b> | 1.94          | 1.93          | 1.94          | 0.06          | 0.00               | 0.00               | 0.05          | 0.00               | 0.99               | 0.00               | 0.01               | 0.01               | 0.07          | 1.02     | U(V)-6  | 14.6 (8.8)   |
| <b>7<sup>2</sup>A</b> | 1.92          | 1.94          | 1.94          | 0.05          | 0.00               | 0.00               | 0.04          | 0.00               | 0.01               | 0.00               | 0.99               | 0.01               | 0.08          | 1.02     | U(V)-7  | 12.7 (10.6)  |
| <b>8<sup>2</sup>A</b> | 1.90          | 1.87          | 1.88          | 0.96          | 0.01               | 0.00               | 0.02          | 0.00               | 0.12               | 0.00               | 0.05               | 0.10               | 0.08          | 0.29     | U(VI)-1 | 0.0 (25.3)   |
| <b>9<sup>2</sup>A</b> | 1.88          | 1.83          | 1.91          | 0.02          | 0.00               | 0.00               | 0.95          | 0.00               | 0.05               | 0.00               | 0.08               | 0.17               | 0.10          | 0.30     | U(VI)-2 | 19.6 (43.7)  |

$[\text{U}@C_{27}\text{B}]^+$ . We have also calculated the relative energies of the lowest electronic states in the cation species employing the same CASSCF/CASPT2 strategy. In this case, the active space is formed by 6 electrons distributed in the all possible ways over qualitatively the same 13 molecular orbitals (Fig. S5) as for the neutral species. The lowest energy states in this species belong to singlet and triplet multiplicities, the energies and the character of these states appear in the Table S2. These results indicate that the closed-shell singlet is clearly the most stable state in the cationic species.

**Table S2.** Energy in kcal mol<sup>-1</sup> and character with the main configuration state functions (CSFs) of the lowest singlet and triplet states of  $[\text{U}@C_{27}\text{B}]^+$ . In the character of the CSF, 2 means doubly occupied and u(up) and d(down) refer to singly occupied MO. The label of the orbitals appears in Figure S5. The number of electrons in U are counted in the localized orbitals.

|                  | Energy [Kcal/mol] | Character                                                                                                                            | #el- in U  |
|------------------|-------------------|--------------------------------------------------------------------------------------------------------------------------------------|------------|
| 1 <sup>1</sup> A | 0.0               | $\langle \varphi_A^2 \varphi_B^2 \varphi_C^2  $ (67%)                                                                                | 0.23 U(VI) |
| 2 <sup>1</sup> A | 83.0              | $\langle \varphi_A^2 \varphi_B^2 \varphi_C^u \varphi_M^d  $ (30%); $\langle \varphi_A^u \varphi_B^2 \varphi_C^2 \varphi_L^d  $ (20%) | 1.01 U(V)  |
| 3 <sup>1</sup> A | 86.7              | $\langle \varphi_A^2 \varphi_B^2 \varphi_C^u \varphi_K^d  $ (78%)                                                                    | 1.01 U(V)  |
| 1 <sup>3</sup> A | 81.7              | $\langle \varphi_A^2 \varphi_B^2 \varphi_C^u \varphi_H^u  $ (31%); $\langle \varphi_A^2 \varphi_B^2 \varphi_C^u \varphi_K^u  $ (17%) | 1.03 U(V)  |
| 2 <sup>3</sup> A | 82.5              | $\langle \varphi_A^2 \varphi_B^2 \varphi_C^u \varphi_L^u  $ (43%); $\langle \varphi_A^2 \varphi_B^2 \varphi_C^u \varphi_M^u  $ (24%) | 1.03 U(V)  |
| 3 <sup>3</sup> A | 85.2              | $\langle \varphi_A^2 \varphi_B^2 \varphi_C^u \varphi_K^u  $ (52%)                                                                    | 1.04 U(V)  |

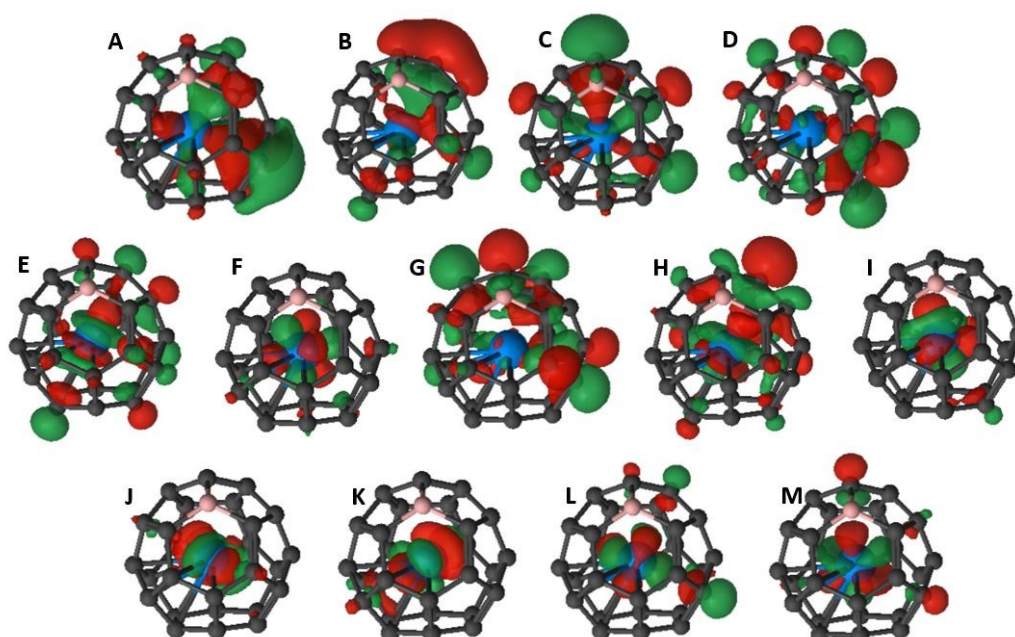

**Figure S5.** SA(10)-CASSCF natural orbitals for the 10 lowest singlets in  $[\text{U}@C_{27}\text{B}]^+$ .

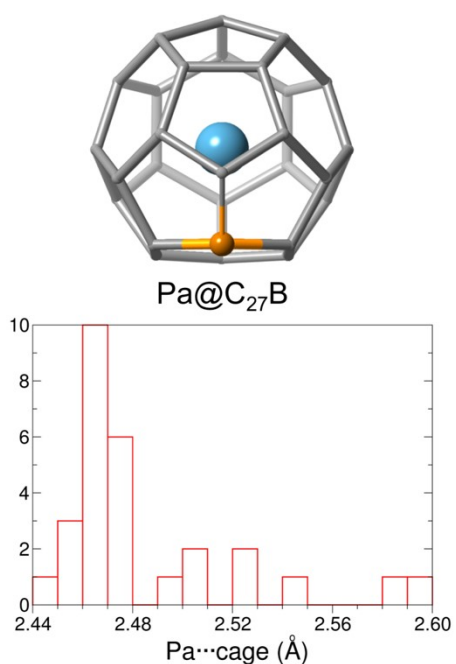

**Figure S6.** Histogram of the Pa-cage distances in the optimized structure of Pa@C<sub>27</sub>B. Above, the optimized structure for the isomer 556 is shown.

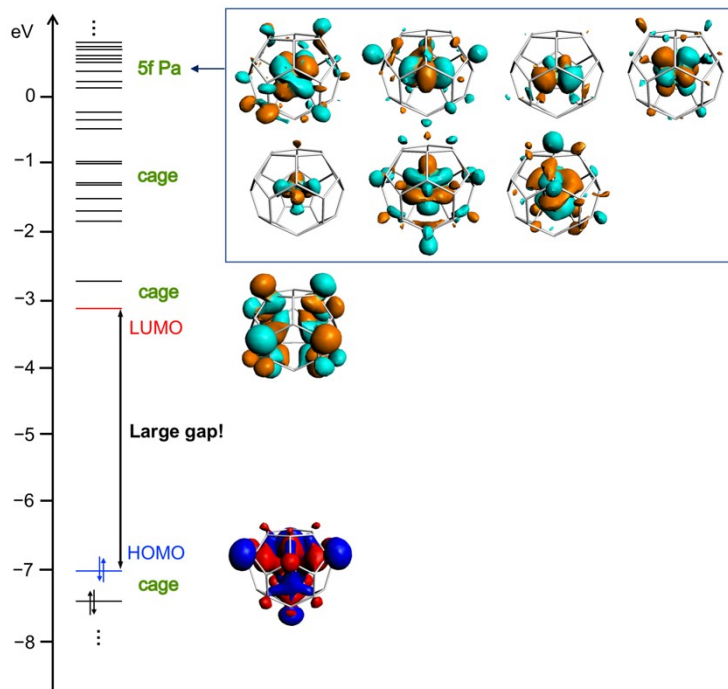

**Figure S7.** Frontier molecular orbitals of Pa@C<sub>27</sub>B at PBE0/TZP level. HOMO and LUMO are essentially cage orbitals and all Pa-5f orbitals are empty.

**Table S3.** Bond critical points (bcp) between the central U and the cage atoms, along with the densities and the Laplacian of the densities at the bcp, for U@C<sub>27</sub>B.

| Atom cage | x         | y         | z         | $\rho_{\text{bcp}}$ (e Å <sup>-3</sup> ) | $\Delta\rho_{\text{bcp}}$ (e Å <sup>-5</sup> ) |
|-----------|-----------|-----------|-----------|------------------------------------------|------------------------------------------------|
| 1         | -0.131368 | -0.538924 | 1.367967  | 0.50                                     | 5.36                                           |
| 2         | -0.23227  | 0.306649  | 1.495469  | 0.52                                     | 4.85                                           |
| 3         | 0.461971  | 0.76069   | 1.356475  | 0.54                                     | 5.32                                           |
| 4         | 1.055883  | 0.159679  | 1.242052  | 0.54                                     | 4.98                                           |
| 5         | 0.726219  | -0.605552 | 1.223279  | 0.53                                     | 4.94                                           |
| 6         | -0.680642 | -0.767722 | 0.813071  | 0.56                                     | 4.96                                           |
| 7         | -1.134102 | -0.0914   | 0.571302  | 0.59                                     | 4.79                                           |
| 8         | -0.863147 | 0.544402  | 0.994445  | 0.52                                     | 5.39                                           |
| 9         | -0.536512 | 1.263678  | 0.581059  | 0.53                                     | 4.60                                           |
| 10        | 0.299517  | 1.314091  | 0.85942   | 0.57                                     | 4.89                                           |
| 11        | 0.81741   | 1.375642  | 0.115233  | 0.52                                     | 5.32                                           |
| 12        | 1.359184  | 0.848443  | -0.023747 | 0.56                                     | 4.93                                           |
| 13        | 1.543515  | 0.257541  | 0.520283  | 0.50                                     | 5.34                                           |
| 14        | 1.477345  | -0.496316 | 0.141454  | 0.49                                     | 4.76                                           |
| 15        | 0.948431  | -1.007839 | 0.536036  | 0.51                                     | 5.20                                           |
| 16        | 0.416062  | -1.263053 | -0.041834 | 0.53                                     | 4.95                                           |
| 17        | -0.431149 | -1.17321  | 0.150554  | 0.50                                     | 5.36                                           |
| 18        | -0.733273 | -0.749493 | -0.537228 | 0.52                                     | 4.85                                           |
| 19        | -1.165231 | -0.096474 | -0.23943  | 0.52                                     | 5.40                                           |
| 20        | -0.854775 | 0.589171  | -0.713325 | 0.53                                     | 4.62                                           |
| 21        | 0.244275  | 1.387249  | -0.537864 | 0.50                                     | 4.44                                           |
| 22        | 0.525748  | 0.760763  | -1.066476 | 0.53                                     | 5.33                                           |
| 23        | 1.170735  | 0.454037  | -0.786012 | 0.56                                     | 4.92                                           |
| 24        | 1.252227  | -0.359797 | -0.666781 | 0.49                                     | 5.34                                           |
| 25        | 0.560232  | -0.887323 | -0.770918 | 0.54                                     | 4.98                                           |
| 26        | -0.136506 | -0.50594  | -1.078874 | 0.54                                     | 5.34                                           |
| 27        | -0.206813 | 0.24357   | -1.201286 | 0.57                                     | 4.88                                           |
| 28        | -0.631707 | 1.312845  | -0.280658 | 0.45                                     | 3.26                                           |

Atom 28 is Boron

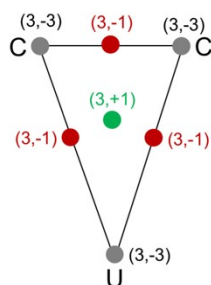

**Figure S8.** Schematic representation of the atom, bond and ring critical points in a triangle formed by the central U and two bonded C atoms of the cage.

**Table S4.** Bond critical points (bcp) between the central Pa and the cage atoms, along with the densities and the Laplacian of the densities at the bcp, for Pa@C<sub>27</sub>B. There is no bcp between Pa and boron (atom 21).

| Atom cage | x         | y         | z         | $\rho_{\text{bcp}}$ (e Å <sup>-3</sup> ) | $\Delta\rho_{\text{bcp}}$ (e Å <sup>-5</sup> ) |
|-----------|-----------|-----------|-----------|------------------------------------------|------------------------------------------------|
| 1         | -0.094442 | -0.524307 | 1.348545  | 0.50                                     | 4.73                                           |
| 2         | -0.222773 | 0.28497   | 1.475013  | 0.47                                     | 4.65                                           |
| 3         | 0.469837  | 0.751319  | 1.338065  | 0.51                                     | 4.67                                           |
| 4         | 1.063617  | 0.16979   | 1.206421  | 0.51                                     | 4.62                                           |
| 5         | 0.686114  | -0.607355 | 1.216082  | 0.50                                     | 4.58                                           |
| 6         | -0.648618 | -0.763279 | 0.809427  | 0.52                                     | 4.72                                           |
| 7         | -1.107693 | -0.087201 | 0.570186  | 0.54                                     | 4.47                                           |
| 8         | -0.833966 | 0.558463  | 0.973548  | 0.50                                     | 4.66                                           |
| 9         | -0.552164 | 1.207339  | 0.596407  | 0.49                                     | 4.12                                           |
| 10        | 0.326741  | 1.287172  | 0.844972  | 0.51                                     | 4.50                                           |
| 11        | 0.78239   | 1.355201  | 0.143853  | 0.50                                     | 4.59                                           |
| 12        | 1.340894  | 0.826983  | -0.002238 | 0.52                                     | 4.58                                           |
| 13        | 1.501062  | 0.249834  | 0.544108  | 0.49                                     | 4.67                                           |
| 14        | 1.460474  | -0.471638 | 0.138614  | 0.45                                     | 4.57                                           |
| 15        | 0.926268  | -1.000553 | 0.545153  | 0.47                                     | 4.65                                           |
| 16        | 0.383319  | -1.246268 | -0.011215 | 0.50                                     | 4.57                                           |
| 17        | -0.389151 | -1.150576 | 0.145153  | 0.50                                     | 4.73                                           |
| 18        | -0.709625 | -0.742948 | -0.503981 | 0.47                                     | 4.65                                           |
| 19        | -1.131912 | -0.071982 | -0.23978  | 0.50                                     | 4.66                                           |
| 20        | -0.86121  | 0.553297  | -0.66109  | 0.49                                     | 4.12                                           |
| 22        | 0.278993  | 1.353583  | -0.520761 | 0.44                                     | 4.18                                           |
| 23        | 0.489448  | 0.738281  | -1.042813 | 0.50                                     | 4.60                                           |
| 24        | 1.154502  | 0.431159  | -0.762294 | 0.52                                     | 4.60                                           |
| 25        | 1.20893   | -0.367723 | -0.645195 | 0.49                                     | 4.66                                           |
| 26        | 0.580874  | -0.84942  | -0.754023 | 0.51                                     | 4.62                                           |
| 27        | -0.119127 | -0.492731 | -1.054974 | 0.51                                     | 4.67                                           |
| 28        | -0.169594 | 0.237503  | -1.172875 | 0.52                                     | 4.50                                           |



**Table S5.** Relative energies (in kcal mol<sup>-1</sup>) of several exohedral U-C<sub>27</sub>B isomers.

| System | Rel. Energy |
|--------|-------------|
| Exo-1  | 163.1       |
| Exo-2  | 160.9       |
| Exo-3  | 177.5       |
| Exo-4  | 185.8       |

In Exo-1, Exo-2 and Exo-3 systems, the U atom is bonded exohedrally to B and C atoms; in Exo-4, the U atom is bonded only to C atoms far from the B atom.

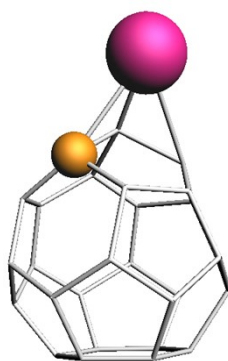

**Figure S9.** Representation of the optimized structure of exohedral U-C<sub>27</sub>B system, named Exo-2 in Table S5.

**Table S6.** QTAIM delocalization indexes for U-cage interactions in U@C<sub>27</sub>B.

| Atom cage | $\delta$ (U-cage) |
|-----------|-------------------|
| 1         | 0.256             |
| 2         | 0.296             |
| 3         | 0.286             |
| 4         | 0.302             |
| 5         | 0.297             |
| 6         | 0.306             |
| 7         | 0.338             |
| 8         | 0.271             |
| 9         | 0.360             |
| 10        | 0.325             |
| 11        | 0.275             |
| 12        | 0.315             |
| 13        | 0.254             |
| 14        | 0.278             |
| 15        | 0.280             |
| 16        | 0.296             |
| 17        | 0.255             |
| 18        | 0.293             |
| 19        | 0.271             |
| 20        | 0.360             |
| 21        | 0.343             |
| 22        | 0.275             |
| 23        | 0.315             |
| 24        | 0.251             |
| 25        | 0.303             |
| 26        | 0.286             |
| 27        | 0.324             |
| (B) 28    | 0.097             |

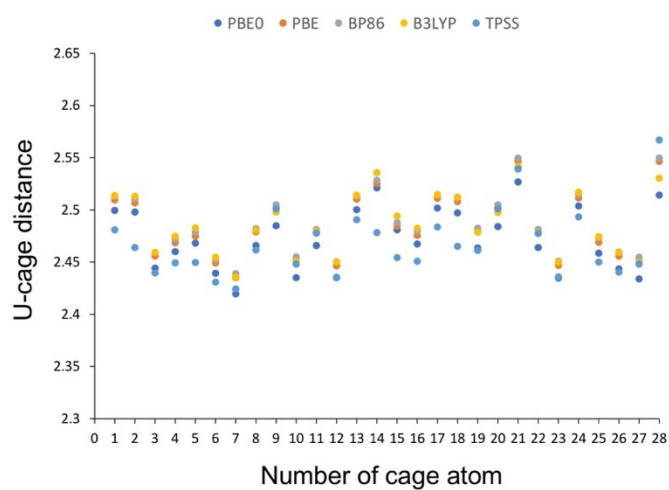

**Figure S10.** U-cage distances for U@C<sub>27</sub>B using different density functionals (PBE0, PBE, BP86, B3LYP, TPSS). Cage atom #28 is boron. Very tiny dispersion for the same U-C distance when changing the functional. For U-B distance, the dispersion is somewhat larger, but still within 0.054 Å.

xyz coordinates of optimized structures at PBE0/TZP level

U@C<sub>27</sub>B

|   |           |           |           |
|---|-----------|-----------|-----------|
| C | -0.331620 | -1.008171 | 2.313556  |
| C | -0.553633 | 0.417211  | 2.510545  |
| C | 0.679227  | 1.171520  | 2.287631  |
| C | 1.734869  | 0.194331  | 2.042345  |
| C | 1.113265  | -1.156309 | 2.035328  |
| C | -1.300866 | -1.431534 | 1.310051  |
| C | -2.101599 | -0.226603 | 0.880394  |
| C | -1.603642 | 0.928661  | 1.642378  |
| C | -1.069637 | 2.106253  | 0.957245  |
| C | 0.369369  | 2.230878  | 1.334761  |
| C | 1.212746  | 2.354806  | 0.100778  |
| C | 2.248708  | 1.363250  | -0.146012 |
| C | 2.569965  | 0.328092  | 0.831234  |
| C | 2.463390  | -0.942609 | 0.129029  |
| C | 1.543422  | -1.837312 | 0.821331  |
| C | 0.572612  | -2.298881 | -0.161578 |
| C | -0.872854 | -2.153588 | 0.116354  |
| C | -1.420029 | -1.416862 | -1.014188 |
| C | -2.150761 | -0.232074 | -0.589397 |
| C | -1.640015 | 0.899345  | -1.362978 |
| C | 0.322894  | 2.341119  | -1.051477 |
| C | 0.703304  | 1.276599  | -1.969105 |
| C | 1.927073  | 0.682698  | -1.454343 |
| C | 2.059404  | -0.758625 | -1.257780 |
| C | 0.875722  | -1.622065 | -1.450171 |
| C | -0.361866 | -1.032617 | -1.947464 |
| C | -0.495118 | 0.401349  | -2.181645 |
| B | -1.139118 | 2.134087  | -0.583894 |
| U | 0.176214  | 0.117585  | 0.140393  |

U@C<sub>27</sub>B<sup>+</sup>

|   |           |           |           |
|---|-----------|-----------|-----------|
| C | 0.853660  | -1.939908 | -1.256393 |
| C | -0.242170 | -1.404839 | -2.046407 |
| C | 0.050944  | -0.033726 | -2.453266 |
| C | 1.413412  | 0.254057  | -2.016692 |
| C | 1.919864  | -0.943832 | -1.264125 |
| C | 0.284565  | -2.421606 | 0.000000  |
| C | -1.185199 | -2.090662 | 0.000000  |
| C | -1.484207 | -1.426481 | -1.280840 |
| C | -2.069277 | -0.103278 | -1.332641 |
| C | -1.073019 | 0.789831  | -2.026269 |
| C | -0.810319 | 1.975863  | -1.183920 |
| C | 0.553399  | 2.275201  | -0.752504 |
| C | 1.656234  | 1.427855  | -1.190828 |
| C | 2.365643  | 0.977964  | 0.000000  |
| C | 2.473013  | -0.474266 | 0.000000  |
| C | 1.919864  | -0.943832 | 1.264125  |
| C | 0.853660  | -1.939908 | 1.256393  |
| C | -0.242170 | -1.404839 | 2.046407  |
| C | -1.484207 | -1.426481 | 1.280840  |
| C | -2.069277 | -0.103278 | 1.332641  |
| C | -1.652744 | 1.909803  | 0.000000  |
| C | -0.810319 | 1.975863  | 1.183920  |
| C | 0.553399  | 2.275201  | 0.752504  |
| C | 1.656234  | 1.427855  | 1.190828  |
| C | 1.413412  | 0.254057  | 2.016692  |
| C | 0.050944  | -0.033726 | 2.453266  |
| C | -1.073019 | 0.789831  | 2.026269  |
| B | -2.444048 | 0.578932  | 0.000000  |
| U | 0.033724  | 0.006349  | 0.000000  |

### U-C<sub>27</sub>B exohedral (Exo-2)

|   |           |           |           |
|---|-----------|-----------|-----------|
| C | -0.298979 | -1.068231 | 2.264919  |
| C | -0.546497 | 0.352377  | 2.520953  |
| C | 0.666372  | 1.111016  | 2.323252  |
| C | 1.690665  | 0.181471  | 2.012222  |
| C | 1.090093  | -1.203706 | 1.986173  |
| C | -1.250209 | -1.486427 | 1.298882  |
| C | -2.067212 | -0.259662 | 0.903910  |
| C | -1.583958 | 0.855311  | 1.663453  |
| C | -1.077663 | 2.053339  | 0.997491  |
| C | 0.336374  | 2.129525  | 1.342326  |
| C | 1.189723  | 2.335540  | 0.198996  |
| C | 2.163521  | 1.346403  | -0.088454 |
| C | 2.502800  | 0.327136  | 0.847095  |
| C | 2.441356  | -0.932149 | 0.121357  |
| C | 1.534935  | -1.850047 | 0.790106  |
| C | 0.579786  | -2.281039 | -0.172259 |
| C | -0.811370 | -2.129601 | 0.106488  |
| C | -1.384862 | -1.386521 | -1.004024 |
| C | -2.109425 | -0.228823 | -0.532067 |
| C | -1.622444 | 0.903655  | -1.257322 |
| C | 0.335632  | 2.570878  | -1.111957 |
| C | 0.633058  | 1.276500  | -1.845257 |
| C | 1.847702  | 0.705750  | -1.395835 |
| C | 2.000931  | -0.709515 | -1.243091 |
| C | 0.872289  | -1.554078 | -1.458791 |
| C | -0.343617 | -0.988974 | -1.933403 |
| C | -0.472117 | 0.433757  | -2.074185 |
| B | -1.197882 | 2.150370  | -0.525039 |
| U | -0.086000 | 4.408745  | -0.431939 |

### Pa@C<sub>27</sub>B

|    |           |           |           |
|----|-----------|-----------|-----------|
| C  | -0.316464 | -0.987268 | 2.303089  |
| C  | -0.549361 | 0.432763  | 2.543238  |
| C  | 0.686348  | 1.188581  | 2.305619  |
| C  | 1.751498  | 0.203346  | 2.056254  |
| C  | 1.119598  | -1.165764 | 2.051579  |
| C  | -1.320276 | -1.440384 | 1.325850  |
| C  | -2.126598 | -0.237582 | 0.898671  |
| C  | -1.594291 | 0.932543  | 1.643195  |
| C  | -1.084540 | 2.119314  | 0.958996  |
| C  | 0.377463  | 2.250597  | 1.345074  |
| C  | 1.197367  | 2.352633  | 0.102787  |
| C  | 2.269716  | 1.374840  | -0.150967 |
| C  | 2.547941  | 0.322035  | 0.833886  |
| C  | 2.488148  | -0.966933 | 0.142872  |
| C  | 1.559315  | -1.857718 | 0.834891  |
| C  | 0.576649  | -2.313827 | -0.155236 |
| C  | -0.856212 | -2.127994 | 0.109675  |
| C  | -1.429649 | -1.428110 | -1.035054 |
| C  | -2.142595 | -0.227207 | -0.587366 |
| C  | -1.654587 | 0.913730  | -1.359315 |
| B  | -1.166134 | 2.193809  | -0.602471 |
| C  | 0.316226  | 2.381044  | -1.064503 |
| C  | 0.691396  | 1.282493  | -1.954609 |
| C  | 1.948136  | 0.694700  | -1.459209 |
| C  | 2.039056  | -0.753518 | -1.233918 |
| C  | 0.886256  | -1.626514 | -1.460925 |
| C  | -0.363494 | -1.031896 | -1.962758 |
| C  | -0.493228 | 0.408655  | -2.195865 |
| Pa | 0.179614  | 0.108913  | 0.151009  |
